**Chromosome-scale genome assembly of *Eustoma grandiflorum*, the first complete genome sequence in family Gentianaceae**

Kenta Shirasawa<sup>1</sup>, Ryohei Arimoto<sup>2</sup>, Hideki Hirakawa<sup>1</sup>, Motoyuki Ishimori<sup>3</sup>, Andrea Ghelfi<sup>1, 4</sup>, Masami Miyasaka<sup>5</sup>, Makoto Endo<sup>2</sup>, Saneyuki Kawabata<sup>3</sup>, Sachiko Isobe<sup>1</sup>

**Affiliations**

1: Kazusa DNA Research Institute, Kazusa-Kamatari, 2-6-7, Kisarazu, Chiba, 292-0818, Japan

2: Takii & Co., Ltd., Hari 1360, Konan, Shiga 520-3231, Japan

3: Graduate School of Agricultural and Life Sciences, The University of Tokyo, 1-1-1, Yayoi, Bunkyo-Ku, Tokyo, 113-8657 Japan

4: Bioinformation and DDBJ Center, National Institute of Genetics, 1111 Yata, Mishima, Shizuoka 411-8540, Japan

5: Nagano Vegetable and Ornamental Crops Experiment Station, 1066-1 Soga, Shiojiri City, Nagano, 399-6461, Japan

**Corresponding author:**

Sachiko Isobe

Kazusa DNA Research Institute, Kazusa-Kamatari 2-6-7, Kisarazu, Chiba, 292-0818, Japan

sisobe@kazusa.or.jp

## Abstract

*Eustoma grandiflorum* (Raf.) Shinn., is an annual herbaceous plant native to the southern United States, Mexico, and the Greater Antilles. It has a large flower with a variety of colors and an important flower crop. In this study, we established a chromosome-scale *de novo* assembly of *E. grandiflorum* by integrating four genomic and genetic approaches: (1) Pacific Biosciences (PacBio) Sequel deep sequencing, (2) error correction of the assembly by Illumina short reads, (3) scaffolding by chromatin conformation capture sequencing (Hi-C), and (4) genetic linkage maps derived from an F<sub>2</sub> mapping population. The 36 pseudomolecules and unplaced 64 scaffolds were created with total length of 1,324.8 Mb. Full-length transcript sequencing was obtained by PacBio Iso-Seq sequencing for gene prediction on the assembled genome, Egra\_v1. A total of 36,619 genes were predicted on the genome as high confidence HC) genes. Of the 36,619, 25,936 were annotated functions by ZenAnnotation. Genetic diversity analysis was also performed for nine commercial *E. grandiflorum* varieties bred in Japan, and 254,205 variants were identified. This is the first report of the construction of reference genome sequences in *E. grandiflorum* as well as in the family Gentianaceae.

**Key Words :** *Eustoma grandiflorum*, Gentianaceae, genome assembly,

## Introduction

*Eustoma grandiflorum* (Raf.) Shinn., commonly known as Lisianthus, prairie gentian, or bluebell gentian, is an annual herbaceous plant native to the southern United States, Mexico, and the Greater Antilles.<sup>1,2</sup> It has a large flower with a variety of colors, such as white, pink, yellow, purple, and purple-edged white.<sup>3</sup> *E. grandiflorum* is cultivated around the world and has become one of the ten most popular cut flowers.<sup>4</sup> It is an important flower crop especially in Japan, ranking fourth in production value in 2017 and third in cultivation area in 2018.<sup>5</sup> Numerous varieties have been bred in the commercial and public sectors<sup>3</sup> as both selfed and F<sub>1</sub> hybrids.

Genus *Eustoma*, which belongs to the family Gentianaceae and the tribe Chironiae, is small, comprising only three species: *E. grandiflorum*, *E. barkleyi* Standely, and *E. exaltatum* (L.) Salisb. Ex Don.<sup>6</sup> *E. grandiflorum* was previously called *E. russellianum* and is sometimes classified as a subspecies of *E. exaltatum*.<sup>7</sup> In the NCBI taxonomy database (<https://www.ncbi.nlm.nih.gov/taxonomy>), *E. grandiflorum* is registered as a heterotypic synonym of *E. exaltatum* subsp. *russellianum* (Taxonomy ID: 52518). *E. grandiflorum* was previously considered an octoploid<sup>8</sup>, but a recent study suggested that *E. grandiflorum* is a diploid, with a chromosome number of  $2n = 2X = 72$ .<sup>9</sup>

The family Gentianaceae consists of six tribes, 99 genera, and approximately 1,736 species.<sup>10</sup> The family name Gentianaceae is derived from Gentius, an Illyrian king in the time of Ancient Greece, who discovered the medicinal properties of gentian. As indicated by the origin of the family name, several species in the family, such as *Gentiana triflora* (gentian) and *Swertia japonica*, have been used as medicinal or herbal plants. However, because they have been relatively less used in industry than other plants have been, the species in this family have not been well studied in modern science, especially in the field of genomics. Chloroplast and plastid genome sequences were reported for several species in the genera *Gentiana*<sup>11-15</sup> and *Pterygocalyx*<sup>6,17</sup>. Transcriptome analyses were also reported for *G. straminea*<sup>18</sup>, *G. rigescens*<sup>19</sup>, and *Swertia nussotii*<sup>20</sup>. However, as far as we currently know, no whole genome sequencing has been reported on a chromosome scale in a Gentianaceae species.

In this study, we established a chromosome-scale *de novo* assembly of *E. grandiflorum* by integrating four genomic and genetic approaches: (1) Pacific Biosciences (PacBio) Sequel deep sequencing, (2) error correction of the assembly by Illumina short reads, (3) scaffolding by chromatin conformation capture sequencing (Hi-C), and (4) genetic linkage maps derived from an F<sub>2</sub> mapping population. Full-length transcript sequencing was obtained by PacBio Iso-Seq sequencing for gene prediction on the assembled genome, Egra\_v1. Genetic diversity analysis was also performed for nine commercial *E. grandiflorum* varieties bred in Japan. This is the first report of the construction of reference genome sequences in *E. grandiflorum* as well as in the

family Gentianaceae. We expect the assembled genome will contribute to the advance of research and breeding in *E. grandiflorum* and will help to identify genes in the family Gentianaceae that will be useful in medicinal and other industries.

## Materials and Methods

### *Whole genome sequencing and assembly*

An *E. grandiflora* inbred line, 10B-620, bred at Nagano Vegetable and Ornamental Crops Experimental Station, was used for whole genome sequencing with Illumina short reads and PacBio long reads. The Genomic DNA was extracted from young leaves with the use of the Genomic DNA Extraction Column (Favorgen Biotech Corp., Ping-Tung, Taiwan) for short reads and the Genomic-tips Kit (QIAGEN, Germantown, MD, USA) for long reads.

An Illumina paired-end (PE) library was constructed with an expected insert size of 500 bp. Library sequencing was performed by an Illumina HiSeq (Illumina, San Diego, CA, USA) system with a read length of 101 nt (Supplementary Table S1). A genome size of 10B-620 was estimated based on kmer-frequency analysis with short reads by using Jellyfish ver. 2.1.1<sup>21</sup>.

A long-read sequence library was prepared using the SMRTbell Express Template Prep Kit 1.0 (PacBio, Menlo Park, CA, USA). The size selection of the library was performed by BluePippin (Sage Science, Beverly, MA, USA) to remove DNA fragments less than 15 kb in length, and the library was then sequenced using the Sequel system (PacBio) with 14 SMRT cells.

The sequence reads were assembled using FALCON Unzip v.1.8.1<sup>22</sup> with default parameters, and the generated primary contig sequences were polished twice using ARROW ver. 2.2.1 implemented in SMRT Link v.5.0 (PacBio). Illumina PE reads were then used for further error correction of the contig sequences by using Pilon 1.22<sup>23</sup>.

### *Linkage map construction*

An F<sub>2</sub> mapping population named 10B-58 was developed from reciprocal crosses between 10B-620 and an inbred *E. grandiflorum* line, 10B-503. The number of F<sub>2</sub> individuals used for linkage map construction was 104. Variants (SNPs and Indels) segregating in the F<sub>2</sub> population were detected by sequencing the dd-RAD-Seq and GRAS-Di libraries. Library construction was performed according to Shirasawa et al. (2016)<sup>24</sup> for dd-RAD-Seq and to Miki et al. (2020)<sup>25</sup> for GRAS-Di. Both libraries were sequenced using Illumina HiSeq 2000 (Illumina). A variant call was performed by bcftools 0.1.19 mpileup in Samtools<sup>26</sup>.

A linkage map was constructed twice by using Lep-MAP3<sup>27</sup> and MSTmap<sup>28</sup>. The map created using Lep-MAP3 (hereinafter Lep map) was constructed with the variants identified on the FALCON-unzip contigs and was used to split misassembled contig sequences by comparing

the SNP positions on the contigs and with those on the linkage groups. The default parameters were used in the Lep-Map3, and the male map positions are shown in this study. The map created using MSTmap (hereinafter MST map) was constructed for the revision of the chromosome-scale scaffolds after the Hi-C analysis. The following parameters were used to construct the linkage map: distance\_function = kosambi, cut\_off\_p\_value = 1e-12, no\_map\_distance = 20, no\_map\_size = 2, missing\_threshold = 0.2, estimation\_before\_clustering = yes, detect\_bad\_data = no, objective\_function = COUNT.

### ***Hi-C scaffolding and construction of chromosome-level scaffolds***

A Hi-C library was constructed from young leaves of 10B-620 using a Proximo Hi-C Plant Kit (Phase Genomics, Seattle, WA, USA). The library was sequenced by Illumina NextSeq500, and the obtained PE reads were aligned onto the scaffolds by BWA<sup>29</sup>. Chromosome-scale scaffolds were created by using the Proximo Hi-C genome scaffolding platform (Phase Genomics) in a method similar to that described by Bickhart et al. (2017)<sup>30</sup>. Juicebox<sup>31</sup> was then used to correct scaffolding errors. The Hi-C scaffolds were then cut and reordered by using ALLMAPS<sup>32</sup> and Ragoo<sup>33,34</sup> with the MST map as a reference, and the chromosome-level scaffold sequences were determined.

Assembly quality was assessed by benchmarking universal single-copy orthologs (BUSCOs) sequences using BUSCO v3.0.<sup>34</sup> Repetitive sequences in the assembled genome were identified by RepeatMasker 4.0.7 (<http://www.repeatmasker.org/RMDownload.html>) for known repetitive sequences registered in Repbase (<https://www.girinst.org/repbase/>) and de novo repetitive sequences defined by RepeatModeler 1.0.11 (<http://www.repeatmasker.org/RepeatModeler>).

### ***Transcriptome sequencing and gene prediction***

Total RNAs were extracted from young leaves and buds of 10B-620 by using the RNeasy Plant Mini Kit RNA (QIAGEN). Iso-Seq libraries were created for leaves and buds in accordance with the manufacturer's protocol (PacBio) and sequenced by a Sequel system with two SMRT cells. The obtained reads were clustered using the Iso-Seq 2 pipeline implemented in SMRT Link ver.5.1.0 (PacBio). The high-quality (hq) Iso-seq sequences were then mapped onto the assembled genome with Minimap2<sup>35</sup> and collapsed to obtain nonredundant isoform sequences using a module in Cupcake ToFU ([https://github.com/Magdoll/cDNA\\_Cupcake](https://github.com/Magdoll/cDNA_Cupcake)). ORF (open reading frame) prediction on the collapsed sequences was performed using ANGEL (<https://github.com/PacificBiosciences/ANGEL>). Redundant sequences were then removed by the CD-HIT program,<sup>36</sup> and nonredundant complete confidence (cc) sequences were mapped onto the assembled genome sequences by GMAP ver. 2020.06.01.<sup>37</sup>

Meanwhile, empirical gene prediction was performed for the repeat masked assembled

genome sequences by BRAKER2<sup>38</sup> with published *E. grandifolium* transcript sequences (Supplementary Table S2). After removal of the redundant variant sequences, the gene sequences predicted by BRAKER v2 were merged with those mapped with cc Iso-Seq sequences. When gene sequences were predicted by both BRAKER v2 and Iso-Seq, the longest CDSs were selected.

In order to classify the predicted gene sequences based on the evidence level, a similarity search was performed against the NCBI NR protein database (<http://www.ncbi.nlm.nih.gov>) and UniProtKB (<https://www.uniprot.org>) using DIAMOND<sup>39</sup> with  $60\% \leq$  similarity,  $50\% \leq$  mapped length  $\leq 150\%$ , and E-value  $\leq 1E-80$ . BLASTP searches were also performed for the gene sequences of *Vitis vinifera* (12X)<sup>40</sup> and *Arabidopsis thaliana* (Araport 11)<sup>41</sup> with  $30\% \leq$  similarity (*V. vinifera*) or  $25\% \leq$  similarity (*A. thaliana*),  $50\% \leq$  mapped length  $\leq 150\%$ , and E-value  $\leq 1E-80$ . Domains were searched by HAMMER v3.3.2 (<http://hmmer.org/>) with E-value  $\leq 1E-30$ , and TPM values were calculated by Salmon (Ref) with the RNA-Seq reads listed in Supplementary Table S2. The high confidence (HC) gene sequences were selected under the following conditions: TPM value  $> 0.2$ , identified protein domain sequences, gene sequence hits in UniProtKB or NR protein database, or *V. vinifera* genes. Transposon elements (TEs) were classified based on the results of similarity searches against UniProtKB. The gene sequences not classified as HC or TE were classified as LC (low confidence). Functional gene annotation was also performed by using a modified version of Hayai annotation,<sup>42</sup> called ZenAnnotation (<https://github.com/aghelfi/ZenAnnotation>), in which it was incorporated OrthoDB sequences in order to allow a contaminant detection. The parameters for sequence alignment, performed by diamond with a more-sensitive algorithm, were sequence identity 50%, query cover 50% and subject cover 50%.

### ***Diversity analysis in nine commercial varieties***

Genetic diversity was investigated in nine commercial varieties bred in Japan: Yukitemari, Borelo white, Paleo pink, Exe lavender, La folia, Umi honoka, Robera clear pink, Korezo light pink, and Celeb pink. Plant materials were grown in the field at Takii Co. Ltd. (Shiga, Japan), and the genomic DNA of each was extracted from young leaves with the use of the Genomic DNA Extraction Column (Favorgen Biotech Corp). Whole genome shotgun (WGS) sequencing was performed by using Illumina Hisex X (Illumina) with 150 PE reads. The WGS reads were mapped onto the assembled genome sequences by using Bowtie 2,<sup>43</sup> and base variants were identified using bcftools 0.1.19 mpileup in Samtools.<sup>29</sup> Genetic distances were calculated by using the Distance Matrix function in TASSEL 5.<sup>44</sup> A NJ phylogenetic tree was constructed using MEGA ver 10.1.8.<sup>45</sup>

## Results and Discussion

### *Estimation of 10B-620 genome size*

WGS reads were obtained for 10B-620 with a total length of 64.26 Gb reads (Supplementary Table S1). The distribution of distinct k-mers ( $k=17$ ) shows a single large peak at multiplicities of 34, suggesting that 10B-620 was a highly homozygous material (Fig. 1). Based on the identified peak, the genome size of 10B-620 was estimated to be 1,587.6 Mb. Lindsay et al. (1994)<sup>46</sup> reported that the nuclear DNA content of diploid *E. grandiflorum* was  $3.26 \pm 0.10$  pg DNA per 2C, which suggested that the total base length of the genome was 1512.64 Mb per C. Our genome size estimation was almost similar with that of the previous report.

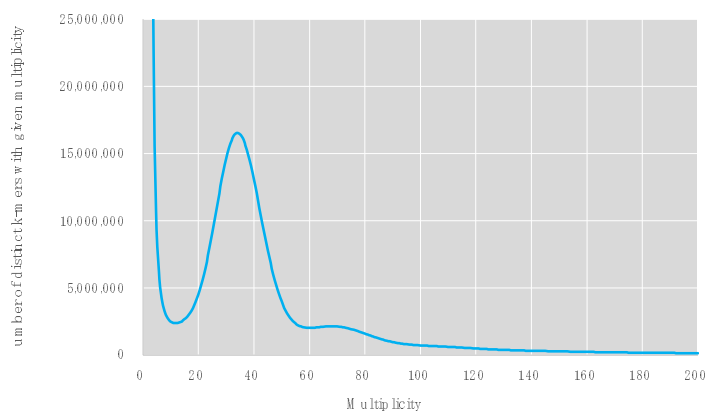

**Fig. 1.** Genome size estimation using Jellyfish with the distribution of the number of distinct kmers ( $kmer = 17$ ) and the given multiplicity values.

### *PacBio assembly*

A total length of 104.47 Gb of PacBio reads was generated from 14 SMRT cells. The obtained read coverage against the 10B-620 genome was 65.8x. The Falcon unzip assembly generated 675 primary and 7,724 haplotig contigs (Supplementary Table S3). The total length of the primary contigs was 1,322.4 Mb, with an N50 length of 4.70 Mb. The primary contig sequences were then polished with Sequel reads using Arrow, followed by further polishing with the Illumina reads using Pilon. The resultant number of primary sequences was 753, with a total length of 1,324.5 Mb.

### *Linkage map construction for identification of misassembly of the PacBio contigs*

dd-RAD-Seq and GRAS-Di sequences were obtained for the 104 F<sub>2</sub> population (10B-58) derived from crosses between 10B-620 and 10B-503. The reads were mapped onto the 753 primary sequences, resulting in the identification of 20,401 (dd-RAD-Seq) and 5,488 (GRAS-Di) base variants. The variants identified from the two libraries were then merged, and a

linkage map was constructed by Lep-MAP3. A total of 20 linkage groups (LGs) were generated, with a total length of 2,331.5 cM (Supplementary Fig. 1). The numbers of mapped loci and bins (unique positions of loci) were 17,872 and 1,358, respectively.

A total of 79 contigs were identified as possible misassemblies by comparing the SNP positions between the Lep map and F<sub>2</sub> genotype segregation patterns. The 79 contigs were split at the points of possible misassembly, and the resultant 753 primary contigs were used for subsequent Hi-C scaffolding (Supplementary Table S3).

### ***Chromosome-level scaffolding with Hi-C reads and a linkage map***

Several different chromosome numbers and ploidies of *E. grandiflorum* have been reported. For example, Rork et al. (1949)<sup>8</sup> described *E. grandiflorum* as an octoploid, with a chromosome number of  $2n = 8X = 72$  based on observation of chromosomes in root chips. Griesbach and Bhat (1990)<sup>47</sup> reported that the basic chromosome number of *E. grandiflorum* was 18 according to a chromosome observation in meiotic metaphase I of diploid *E. grandiflorum*. Meanwhile, Kawakatsu et al. (2021)<sup>9</sup> suggested that the chromosome number of *E. grandiflorum* was considered to be  $2n = 2x = 72$ , based on the result of SSR linkage map construction and the *E. exaltatum* chromosome number of  $2n = 2x = 72$  reported by Barba-Gonzalez et al. (2015)<sup>6</sup>. Hence, we constructed chromosome-level scaffolds under the conclusion that the basic chromosome number of *E. grandiflorum* was  $n = 36$ .

A total of 589.9 M Hi-C reads were generated and used for scaffolding of the 753 primary contigs with N100. The generated number of scaffolds was 100, including 36 chromosome-level scaffolds. The total length of the 100 scaffolds was 1,324.8 Mb, and the 36 chromosome-level scaffolds occupied 98.8% of the total length.

In order to identify possible misassemblies on the Hi-C scaffolds, a linkage map was reconstructed by using the MST map. The dd-RAD-Seq and GRAS-Di sequences of the F<sub>2</sub> population were mapped onto the 100 Hi-C scaffold sequences. The variants were filtered out with  $DP \geq 10$  and  $GQ \geq 50$ , and 6,430 variants on the 36 chromosome-level scaffolds were mapped onto 43 LGs. The larger number of LGs than scaffolds suggested possible misassemblies in the process of Hi-C scaffolding.

We then tried to realign the primary contigs that were scaffolded on the wrong position by Hi-C analysis, by referring to base variant positions on the MST map. First, the positions corresponding to the 6,430 variants on the MST map were determined to be against for the primary contigs. As a result, the positions of the 6,430 variants were determined on 360 of the 753 primary contigs. The 360 primary contigs were then aligned on the MST map by using ALLMAPS (here, let's call the resultant sequences ALLMAPS scaffolds). The 36 chromosome-scale Hi-C scaffold sequences were aligned onto the ALLMAPS scaffolds by using



Ragoo with the chimera cut option. After making several manual minor revisions, we created 36 pseudomolecules out of the 36 chromosome-scale scaffolds. The correspondence positions on the pseudomolecules and MST map, as well as the summary of the MST map, are shown in Fig. 4 and Supplementary Tables S4 and S5, respectively.

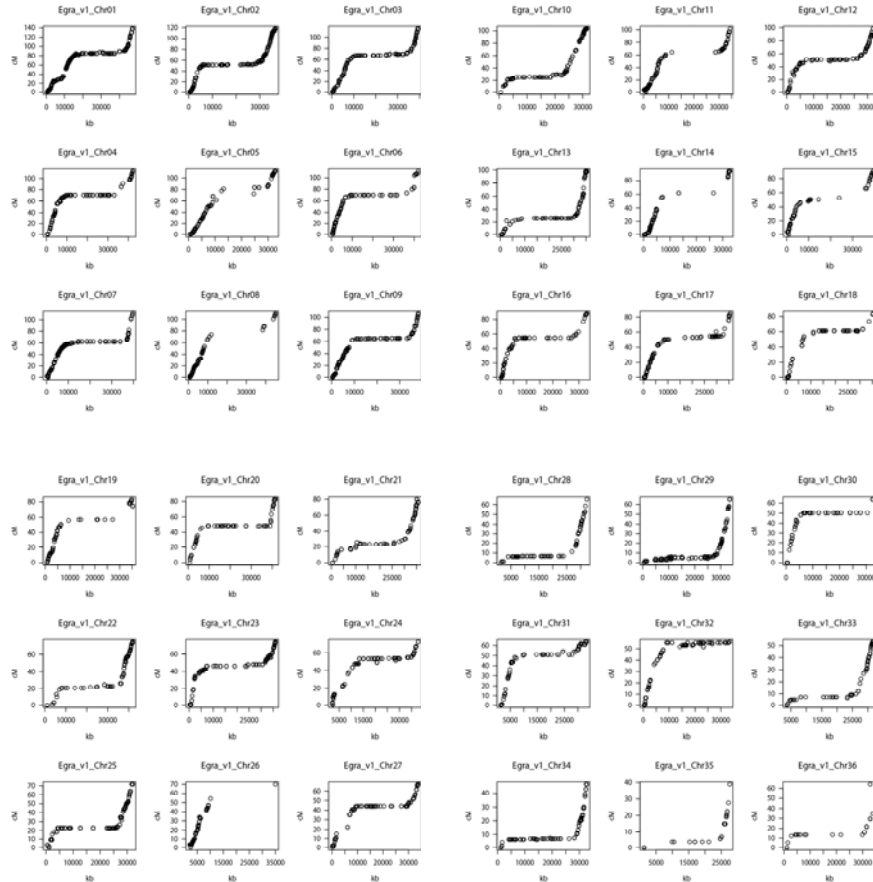

**Fig. 4.** Correlation between physical and genetic distance on the *Eustoma* genome. The genetic distances were calculated from the 10B-581 F2 linkage map.

The 36 pseudomolecules and 64 unplaced scaffolds were designated 'Egra\_v1'. The total length of Egra\_v1 is 1,324.8 Mb, with a gap length of 329,560 bp (Table 1, Supplementary Table S3). The total length of the 36 pseudomolecules is 1,308.6 Mb, occupying 98.8% of the assembled sequences. The corresponding chromosome numbers of the pseudomolecules are given in longer sequence order. The lengths of the 36 pseudomolecules ranged from 47.12 Mb (Chr01) to 29.6 Mb (Chr36, Supplementary Table S6). When the total lengths are compared with the estimated genome size of 10B-620 (1,587.6 Mb), all of the assembled scaffolds and the 36 pseudomolecules in Egra\_v1 cover 83.4% and 82.4% of the genome, respectively.

The assembly quality of Egra\_v1 was investigated by mapping the sequences onto

1,375 BUSCOs (Table 1). The results demonstrated that the number of complete BUSCOs was 1,301 (94.6%), including 1,110 (80.7%) single-copy genes and 191 (13.8%) duplicated genes. There were 21 and 54 fragmented and missing BUSCOs, respectively.

Table 1. Statistics on the assembled *Eustoma* genome sequences and CDSs (Egra\_v1).

|                      | Genome                                 |                                  | Gene                |
|----------------------|----------------------------------------|----------------------------------|---------------------|
|                      | Pseudomolecules<br>+unplaced scaffolds | Pseudomolecules<br>(Chr01-Chr36) | HC, CDS             |
| Sequence name        | Egra_v1.pmol.fasta                     | Egra_v1.Chr01-36.fasta           | Egra_v1.0_cds_HC.fa |
| Number of sequences  | 100                                    | 36                               | 36,619              |
| Total length (bp)    | 1,324,827,894                          | 1,308,663,487                    | 44,975,160          |
| Average length (bp)  | 13,248,279                             | 36,351,764                       | 1,228               |
| Maximum length (bp)  | 47,116,834                             | 47,116,834                       | 16,125              |
| Minimum length (bp)  | 4,000                                  | 29,635,164                       | 87                  |
| N50 length (bp)      | 35,699,481                             | 35,699,481                       | 1,680               |
| Gaps (%)             | 0                                      | 0                                | 0.006               |
| GC%                  | 37.9                                   | 37.9                             | 44.0                |
| BUSCOs (%) v3, obd10 |                                        |                                  |                     |
| Complete             | 1,301 (94.6%)                          | 1,276 (92.8%)                    | 1,227 (89.2%)       |
| Complete single-copy | 1,110 (80.7%)                          | 1,099 (79.9%)                    | 1,046 (76.1%)       |
| Complete duplicated  | 191 (13.9%)                            | 177 (12.9%)                      | 83 (13.1%)          |
| Fragmented           | 21 (1.5%)                              | 22 (1.6%)                        | 83 (6.0%)           |
| Missing              | 54 (3.9%)                              | 77 (5.6%)                        | 66 (4.8%)           |

### ***Gene prediction and annotation***

Iso-Seq sequences totaling 735.8 Mb and 982.2 Mb in length were obtained from leaves and young buds, respectively (Supplementary Table S1). The sequences from the two organs were integrated and clustered by Iso-Seq2, and the 50,934 high-quality (hq) sequences were assembled (Supplementary Table S7). The 50,934 sequences were collapsed and filtered based on quality. The resultant 29,132 sequences were then predicted ORF, and 11,175 nonduplicate full-length cDNA sequences were determined, with a total length of 14.0 Mb.

Meanwhile, *de novo* gene prediction was performed on the Egra\_v1 genome sequences by using BRAKER2 with the *E. grandiflorum* transcript sequences listed in Supplementary Table S2. As a result, 202,561 candidate genes were predicted on the genome, with a total length of 242 Mb. The predicted gene sequences were merged with the 11,175 full-length cDNA sequences, and the resultant 200,998 sequences were classified as HC, LC, or

TE based on evidence level.

The numbers of predicted gene sequences classified as HC, LC, and TE were 36,619, 76,014, and 88,365, respectively (Supplementary Table S8, Table 1). The percentage of complete BUSCOs in HC was 89.2%, while those in LC and TE were 1.2% and 1.5%, respectively. Therefore, most of the protein coding gene sequences were designated as HC.

Functional gene annotation was performed by using a modified version of Hayai annotation with refereeing through the Kusaki database (<http://pgdbjstnp.kazusa.or.jp/app/kusakidb>). The numbers of functional annotated genes in HC, LC and TE were 25,936, 16,929 and 54,565, respectively (Supplementary Table S9). The most frequently listed species as top hit species against the *E. grandiflorum* genes were *Coffea arabica* (40.3%), then *C. canephora* (9.1%) and *C. eugenioides* (3.4%). The frequently observed top hit families were Rubiaceae, Solanaceae and Nyssaceae, occupying 53.1%, 8.0% and 5.5% of the top hit family list, respectively (Supplementary Table S10). There were 10,356 genes annotated with GO and GOSLIM-PIR terms, 13,205 with PFAM, 13,826 with InterPro and 1,467 with EC (Supplementary table S11-S15).

#### ***Diversity analysis in nine commercial varieties***

Illumina PE reads of the nine *E. grandiflorum* varieties bred by Japanese commercial companies were mapped onto Egra\_v1 to detect base variants. A total of 16,412,137 candidate variants were identified and filtered according to the following conditions: QUAL  $250 \leq$ , DP  $10 \leq$ , GQ  $10 \leq$ , max-missing = 0.8, and excluding MAF (minor allele frequency) = 0 or 0.5. The remaining number of variants was 254,205. The base variant density on Egra\_v1 is shown in Fig. 4. In most of the chromosomes, fewer variants were observed in the middle. However, a few chromosomes, such as Chr5 and Chr31, showed more variants in the middle. Phylogenetic analysis showed that 'Borelo white' was genetically distant from the other eight varieties (Fig. 5).

#### **Conclusion**

In this study we established a chromosome-scale genome assembly of *E. grandiflorum*, the first complete genome sequence in the family Gentianaceae. The assembled genome covered 83.4% of the estimated genome, and the 36 pseudomolecules occupied 98.8% of the assembled genome. In addition, a total of 36,619 protein coding genes were identified on the assembled genome with high confidence. The resultant genome assembly will be useful for genetic and genomic studies and will deepen our understanding of the species in the genus *Eustoma* and the family Gentianaceae.

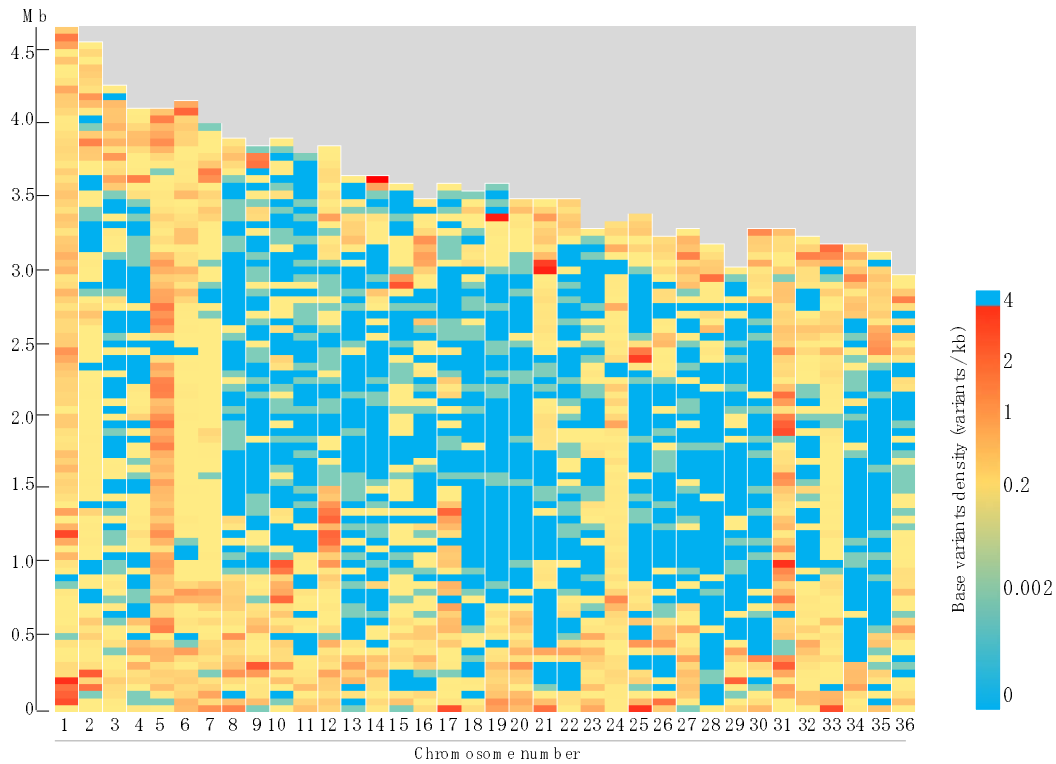

**Fig. 4.** Base variant density on the *Eustoma* genome. The variants were identified with the nine *Eustoma* varieties, and the density (variants/kb) was calculated in each 500 kb windows.

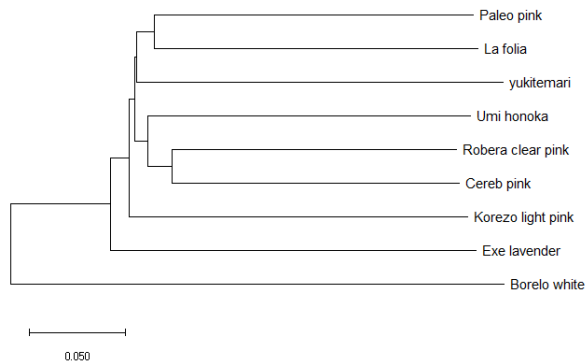

**Fig. 5.** Phylogenetic tree of the nine *Eustoma* varieties based on 254,205 variants.

#### Data availability

The assembled genome sequences have been submitted to the DDBJ/ENA/NCBI public sequence databases under the BioProject ID PRJDB12119. The assembled genome and

gene sequences, the SNPs of the nine commercial varieties, and the MST map information are available at Plant GARDEN (<https://plantgarden.jp/en/list/t52518>).

### Acknowledgments

We acknowledge technical assistance by Akiko Watanabe, Yoshie Kishida, Shinobu Nakayama, Shigemi Sasamoto, Hisano Tsuruoka, Chiharu Minami, Mitsuyo Kohara, Takaharu Kimura, Manabu Yamada, Tshunakazu Fujishiro, Akiko Komaki, Akiko Obara, Rie Aomiya, and Taeko Shibasaki of the Kazusa DNA Research Institute. This work was supported by Research Funds provided by Takii Co. Ltd. and the Kazusa DNA Research Institute.

### References

1. Shinnors, L. H. 1957, Synopsis of the genus *Eustoma* (Gentianaceae). *The Southwestern Naturalist*, 38-43.
2. Cruz-Duque, A., Tapia-Campos, E., Rodriguez-Domínguez, J. and Barba-Gonzalez, R. 2017, Research on native ornamental species from Mexico. *International Symposium on Wild Flowers and Native Ornamental Plants 1240*, pp. 1-12.
3. Ohkawa, K. and Sasaki, E. 1997, *Eustoma* (Lisianthus)-its past, present, and future. *International Symposium on Cut Flowers in the Tropics 482*, pp. 423-428.
4. Azadi, P., Bagheri, H., Nalousi, A. M., Nazari, F. and Chandler, S. F. 2016, Current status and biotechnological advances in genetic engineering of ornamental plants. *Biotechnol Adv*, **34**, 1073-1090.
5. Onozaki, T., Satou, M., Azuma, M., Kawabe, M., Kawakatsu, K. and Fukuta, N. 2020, Evaluation of 29 *Lisianthus* Cultivars (*Eustoma grandiflorum*) and One Inbred Line of *E. exaltatum* for Resistance to Two Isolates of *Fusarium solani* by Using Hydroponic Equipment. *The Horticulture Journal*, **89**, 473-480.
6. Barba-Gonzalez, R., Tapia-Campos, E., Lara-Bañuelos, T. Y., Cepeda-Cornejo, V., Dupre, P. and Arratia-Ramirez, G. 2015, INTERSPECIFIC HYBRIDIZATION ADVANCES IN THE GENUS EUSTOMA. 1097 Ed., International Society for Horticultural Science (ISHS), Leuven, Belgium, pp. 93-100.
7. Turner, B. L. 2014, Taxonomic overview of *Eustoma* (Gentianaceae). *Phytologia*, **96**, 7-11.
8. Rork, C. L. 1949, CYTOLOGICAL STUDIES IN THE GENTIANACEAE. *American Journal of Botany*, **36**, 687-701.
9. Kawakatsu, K., Yagi, M., Harada, T., et al. 2021, Development of an SSR marker-based genetic linkage map and identification of a QTL associated with flowering time in *Eustoma*. *Breeding Science*, **71**, 344-353.

10. Struwe, L. 2014, Classification and evolution of the family Gentianaceae. *The Gentianaceae-Volume 1: Characterization and Ecology*, 13-35.
11. Ni, L., Zhao, Z., Xu, H., Chen, S. and Dorje, G. 2016, The complete chloroplast genome of *Gentiana straminea* (Gentianaceae), an endemic species to the Sino-Himalayan subregion. *Gene*, **577**, 281-288.
12. Fu, P.-C., Zhang, Y.-Z., Geng, H.-M. and Chen, S.-L. 2016, The complete chloroplast genome sequence of *Gentiana lawrencei* var. *farreri* (Gentianaceae) and comparative analysis with its congeneric species. *PeerJ*, **4**, e2540.
13. Sun, S., Wang, H. and Fu, P. 2019, Complete plastid genome of *Gentiana trichotoma* (Gentianaceae) and phylogenetic analysis. *Mitochondrial DNA Part B*, **4**, 2775-2776.
14. Shang, M., Meng, X., Yan, F., Qian, J., Duan, B. and Wang, Y. 2020, Assembly and phylogenetic analysis of the complete chloroplast genome sequence of *Gentiana scabra* Bunge. *Mitochondrial DNA Part B*, **5**, 1691-1692.
15. Huang, C.-X., Liu, M.-L., Zhang, H.-J., Chang, L., Wang, Y.-C. and Yan, J.-X. 2019, The complete nucleotide sequence of chloroplast genome of *Gentiana apiata* (Gentianaceae), an endemic medicinal herb in China. *Mitochondrial DNA Part B*, **4**, 2596-2597.
16. Wang, J., Cao, Q., Wang, K., Xing, R., Wang, L. and Zhou, D. 2019, Characterization of the complete chloroplast genome of *Pterygocalyx volubilis* (Gentianaceae). *Mitochondrial DNA Part B*, **4**, 2579-2580.
17. Zou, B., Long, W. and Yang Wu, L. H. 2021, The complete plastid genome of *Phoenix canariensis* Chabaud (Arecaceae) and phylogenetic analysis. *Mitochondrial DNA Part B*, **6**, 140-142.
18. Zhou, T., Wang, J., Jia, Y., Li, W., Xu, F. and Wang, X. 2018, Comparative chloroplast genome analyses of species in *Gentiana* section *Cruciata* (Gentianaceae) and the development of authentication markers. *International journal of molecular sciences*, **19**, 1962.
19. Zhang, X., Allan, A. C., Li, C., Wang, Y. and Yao, Q. 2015, De novo assembly and characterization of the transcriptome of the Chinese medicinal herb, *Gentiana rigescens*. *International journal of molecular sciences*, **16**, 11550-11573.
20. Hon, T., Mars, K., Young, G., et al. 2020, Highly accurate long-read HiFi sequencing data for five complex genomes. *bioRxiv*.
21. Marçais, G. and Kingsford, C. 2011, A fast, lock-free approach for efficient parallel counting of occurrences of k-mers. *Bioinformatics*, **27**, 764-770.
22. Chin, C.-S., Peluso, P., Sedlazeck, F. J., et al. 2016, Phased diploid genome assembly with single-molecule real-time sequencing. *Nature methods*, **13**, 1050-1054.

23. Walker, B. J., Abeel, T., Shea, T., et al. 2014, Pilon: an integrated tool for comprehensive microbial variant detection and genome assembly improvement. *PLoS one*, **9**, e112963.
24. Shirasawa, K., Hirakawa, H. and Isoe, S. 2016, Analytical workflow of double-digest restriction site-associated DNA sequencing based on empirical and in silico optimization in tomato. *DNA research*, **23**, 145-153.
25. Miki, Y., Yoshida, K., Enoki, H., et al. 2020, GRAS-Di system facilitates high-density genetic map construction and QTL identification in recombinant inbred lines of the wheat progenitor *Aegilops tauschii*. *Scientific Reports*, **10**, 21455.
26. Li, H., Handsaker, B., Wysoker, A., et al. 2009, The Sequence Alignment/Map format and SAMtools. *Bioinformatics*, **25**, 2078-2079.
27. Rastas, P. 2017, Lep-MAP3: robust linkage mapping even for low-coverage whole genome sequencing data. *Bioinformatics*, **33**, 3726-3732.
28. Wu, Y., Bhat, P. R., Close, T. J. and Lonardi, S. 2008, Efficient and accurate construction of genetic linkage maps from the minimum spanning tree of a graph. *PLoS genetics*, **4**, e1000212.
29. Li, H. and Durbin, R. 2009, Fast and accurate short read alignment with Burrows–Wheeler transform. *Bioinformatics*, **25**, 1754-1760.
30. Bickhart, D. M., Rosen, B. D., Koren, S., et al. 2017, Single-molecule sequencing and chromatin conformation capture enable de novo reference assembly of the domestic goat genome. *Nature Genetics*, **49**, 643-650.
31. Durand, N. C., Robinson, J. T., Shamim, M. S., et al. 2016, Juicebox provides a visualization system for Hi-C contact maps with unlimited zoom. *Cell systems*, **3**, 99-101.
32. Tang, H., Zhang, X., Miao, C., et al. 2015, ALLMAPS: robust scaffold ordering based on multiple maps. *Genome biology*, **16**, 1-15.
33. Alonge, M., Soyk, S., Ramakrishnan, S., et al. 2019, RaGOO: fast and accurate reference-guided scaffolding of draft genomes. *Genome biology*, **20**, 1-17.
34. Simão, F. A., Waterhouse, R. M., Ioannidis, P., Kriventseva, E. V. and Zdobnov, E. M. 2015, BUSCO: assessing genome assembly and annotation completeness with single-copy orthologs. *Bioinformatics*, **31**, 3210-3212.
35. Li, H. 2018, Minimap2: pairwise alignment for nucleotide sequences. *Bioinformatics*, **34**, 3094-3100.
36. Fu, L., Niu, B., Zhu, Z., Wu, S. and Li, W. 2012, CD-HIT: accelerated for clustering the next-generation sequencing data. *Bioinformatics*, **28**, 3150-3152.
37. Wu, T. D. and Watanabe, C. K. 2005, GMAP: a genomic mapping and alignment program for mRNA and EST sequences. *Bioinformatics*, **21**, 1859-1875.

38. Brůna, T., Hoff, K. J., Lomsadze, A., Stanke, M. and Borodovsky, M. 2021, BRAKER2: Automatic eukaryotic genome annotation with GeneMark-EP+ and AUGUSTUS supported by a protein database. *NAR genomics and bioinformatics*, **3**, lqaa108.
39. Buchfink, B., Xie, C. and Huson, D. H. 2015, Fast and sensitive protein alignment using DIAMOND. *Nature Methods*, **12**, 59-60.
40. Jaillon, O., Aury, J.-M., Noel, B., et al. 2007, The grapevine genome sequence suggests ancestral hexaploidization in major angiosperm phyla. *Nature*, **449**, 463-467.
41. Cheng, C. Y., Krishnakumar, V., Chan, A. P., Thibaud-Nissen, F., Schobel, S. and Town, C. D. 2017, Araport11: a complete reannotation of the Arabidopsis thaliana reference genome. *The Plant Journal*, **89**, 789-804.
42. Ghelfi, A., Shirasawa, K., Hirakawa, H. and Isobe, S. 2019, Hayai-Annotation Plants: an ultra-fast and comprehensive functional gene annotation system in plants. *Bioinformatics*, **35**, 4427-4429.
43. Langmead, B. and Salzberg, S. L. 2012, Fast gapped-read alignment with Bowtie 2. *Nature methods*, **9**, 357.
44. Bradbury, P. J., Zhang, Z., Kroon, D. E., Casstevens, T. M., Ramdoss, Y. and Buckler, E. S. 2007, TASSEL: software for association mapping of complex traits in diverse samples. *Bioinformatics*, **23**, 2633-2635.
45. Kumar, S., Tamura, K. and Nei, M. 1994, MEGA: molecular evolutionary genetics analysis software for microcomputers. *Bioinformatics*, **10**, 189-191.
46. Lindsay, G., Hopping, M. and O'Brien, I. 1994, Detection of protoplast-derived DNA tetraploid Lisianthus (*Eustoma grandiflorum*) plants by leaf and flower characteristics and by flow cytometry. *Plant cell, tissue and organ culture*, **38**, 53-55.
47. Griesbach, R. and Bhat, R. 1990, Colchicine-induced polyploidy in *Eustoma grandiflorum*. *HortScience*, **25**, 1284-1286.



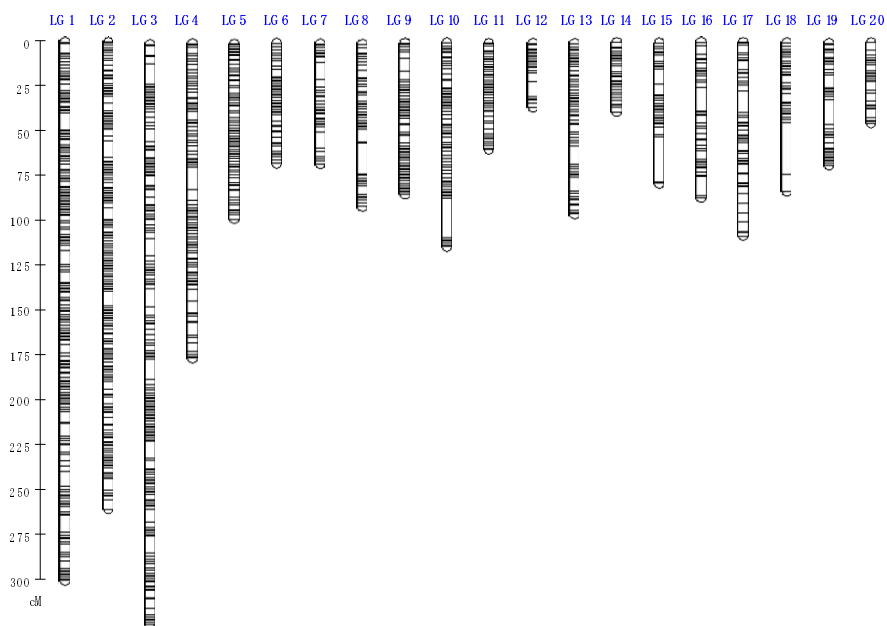

**Supplementary Fig. S1.** Lep-MAP3 linkage map (male) of the 10B-58 F2 mapping population derived from crosses between 10B-620 and 10B-503. The numbers of mapped loci and bins were 17,873 and 1,358, respectively.
